# Supplementary material for: Objectivizing issues in the diagnosis of complex rare diseases: lessons learned from testing existing diagnosis support systems on ciliopathies
Source: PubMed Central journal article supplement (PMC11127295; doi:10.1186/s12911-024-02538-8), 2024-05-24
Supplement: 12911_2024_2538_MOESM2_ESM.pdf [file 12911_2024_2538_MOESM2_ESM.pdf]

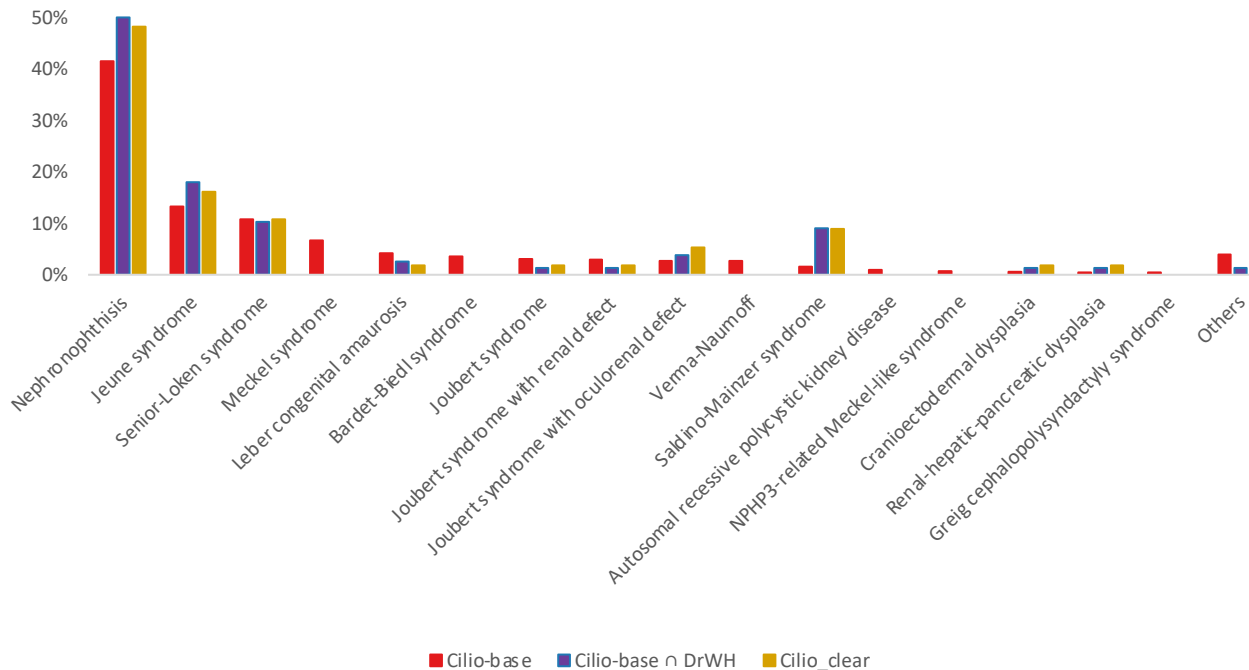

**Additional Figure 1. Proportions of ciliopathy diagnoses per database.** Proportions of diagnoses among patients with medical and genetic diagnosis for Cilio-base (in red), Cilio-base ∩ Dr. Warehouse (in purple) and *cilio\_clear* patients (in yellow).
